# Supplementary material
Source: PubMed Central journal article supplement (PMC3442575)
Supplement: supp_tpc.112.097949_tpc097949Supplementalrev.pdf [file supp_tpc.112.097949_tpc097949Supplementalrev.pdf]

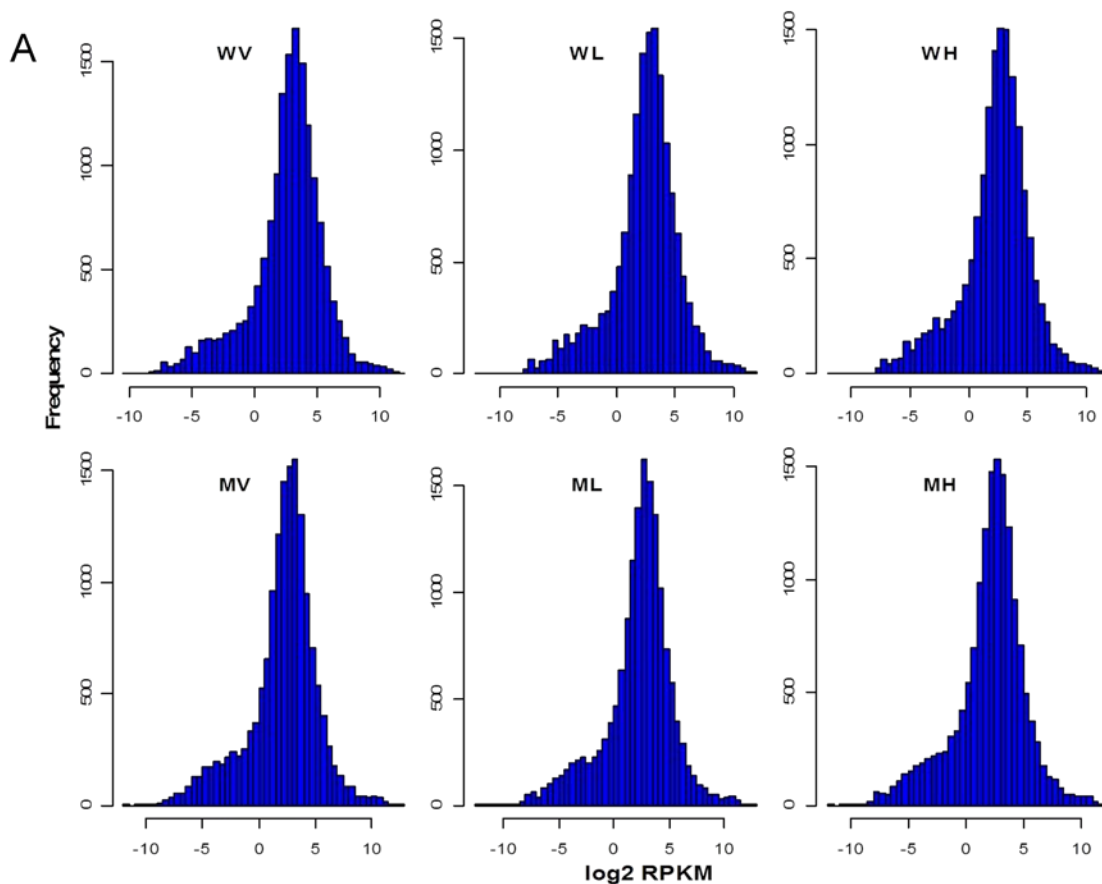

**B**

| Percentiles | WV     | WL     | WH     | MV     | ML     | MH     | average |
|-------------|--------|--------|--------|--------|--------|--------|---------|
| 5th         | 0.052  | 0.046  | 0.045  | 0.036  | 0.036  | 0.036  | 0.050   |
| median      | 7.559  | 6.393  | 6.085  | 5.685  | 6.114  | 5.412  | 6.602   |
| 95th        | 90.893 | 89.327 | 89.106 | 79.273 | 83.608 | 82.291 | 85.495  |

**Supplemental Figure 1. Gene expression level distributions for each treatment condition.**

**(A)** The expression RPKM values are averaged between replicates under each treatment condition, then transformed by logarithm base 2. The title of each histogram indicates each strain and CO<sub>2</sub> treatment condition: WV = wild type under VL-CO<sub>2</sub> induction; WL = wild type under L-CO<sub>2</sub> induction; WH = wild type under H-CO<sub>2</sub> induction; MV = *cia5* under VL-CO<sub>2</sub> induction; ML = *cia5* under L-CO<sub>2</sub> induction; MH = *cia5* under H-CO<sub>2</sub> induction. The shapes of these distributions are very similar among all 6 conditions.

**(B)** This table summarizes the untransformed RPKMs' 5<sup>th</sup>, 50<sup>th</sup>, and 95<sup>th</sup> percentiles for each treatment condition and the average across conditions; these values are relatively consistent among all 6 treatment conditions.

**A**

| ProteinID | Name | Correlation |
|-----------|------|-------------|
| 522126    | CAH1 | 0.98555     |
| 526413    | CAH3 | 0.994444    |
| 512520    | CAH6 | 0.970274    |
| 518901    | CCM1 | 0.921299    |
| 518934    | HLA3 | 0.980099    |
| 510298    | LCIB | 0.995218    |
| 522129    | LCIE | 0.968522    |
| 523557    | RHP1 | 0.981095    |

**B**

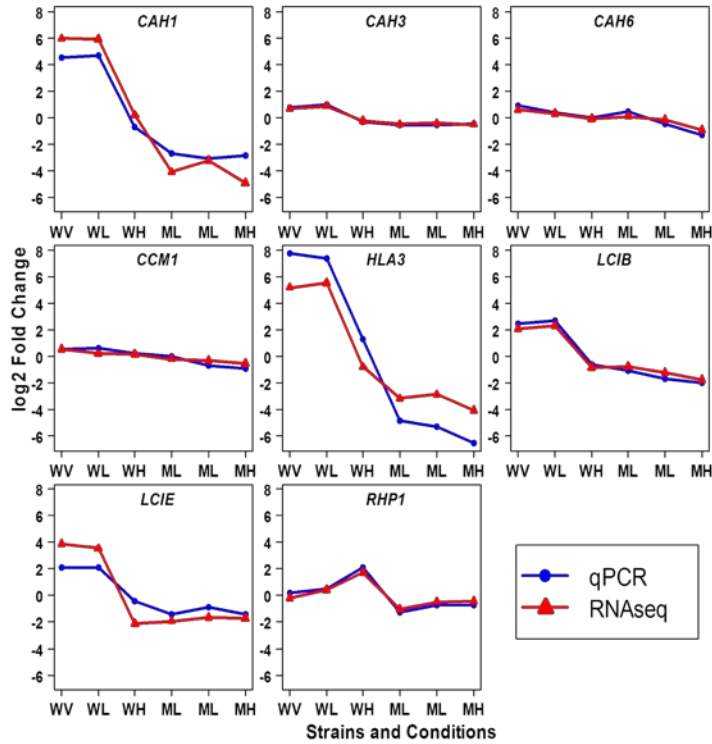

**Supplemental Figure 2. Validation of RNA-Seq by qPCR.**

**(A)** Correlation coefficients between RNA-Seq and qPCR results for each of 8 genes. The correlation coefficients were calculated based on the log<sub>2</sub> Fold Change of each individual condition relative to the overall mean across six conditions from the normalized RNA-Seq data and relative fold change values from the normalized qPCR data.

**(B)** Relative log<sub>2</sub> Fold Change plot for selected genes. Horizontal axis indicates each strain and CO<sub>2</sub> induction condition: WV = wild type under VL-CO<sub>2</sub> induction; WL = wild type under L-CO<sub>2</sub> induction; WH = wild type under H-CO<sub>2</sub> induction; MV = *cia5* under VL-CO<sub>2</sub> induction; ML = *cia5* under L-CO<sub>2</sub> induction; MH = *cia5* under H-CO<sub>2</sub> induction. Red lines and blue lines separately represent RNA-Seq and qPCR relative log<sub>2</sub> fold, and the closeness of the two lines visually illustrates the agreement between the 2 techniques.

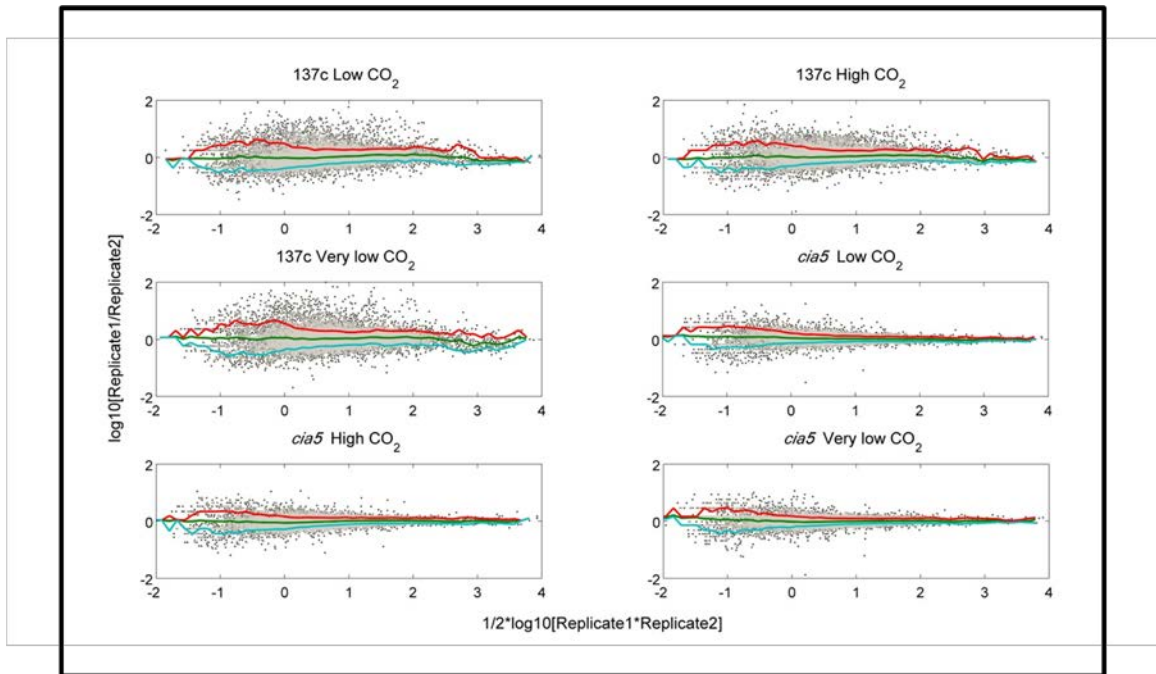

**Supplemental Figure 3. Mean-difference scatter plots for biological replicates.**

For each experiment, the log-log plot represents the fold change (y-axis) as a function of the geometric mean (x-axis), for each pair of replicates of the same experiment. Quantile line plots in running windows on the x-axis represent the 90<sup>th</sup> (red), mean (green) and 10<sup>th</sup> (cyan) quantile of the fold changes. In all cases it can be seen that the mean fold change is around 0 (green line) and a majority of genes show high correlation between different replicates, across most of the dynamic range of the mean expression.

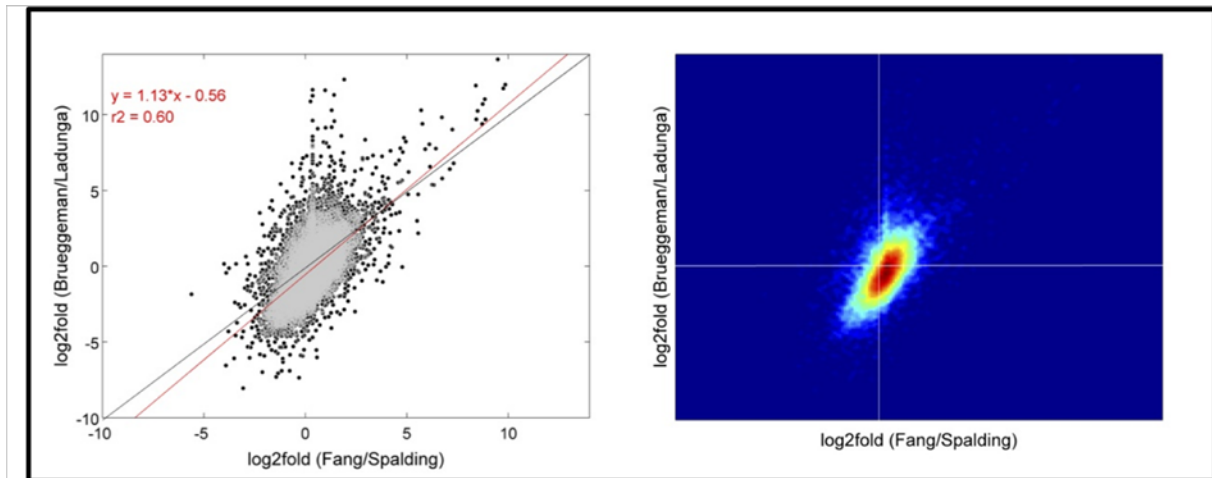

**Supplemental Figure 4. Comparison of log<sub>2</sub> fold change estimates between different datasets.**

Left: log<sub>2</sub> fold changes of 3 hours after CO<sub>2</sub> deprivation from our companion paper (Brueggeman et al. 2012) are plotted against our fold changes estimates of very low versus high CO<sub>2</sub>. A perfect linear relationship is represented with a black line, and the results from a linear fit are highlighted in red. Right: a density histogram of the same data is plotted to show that a majority of fold change estimates are in agreement between both datasets.

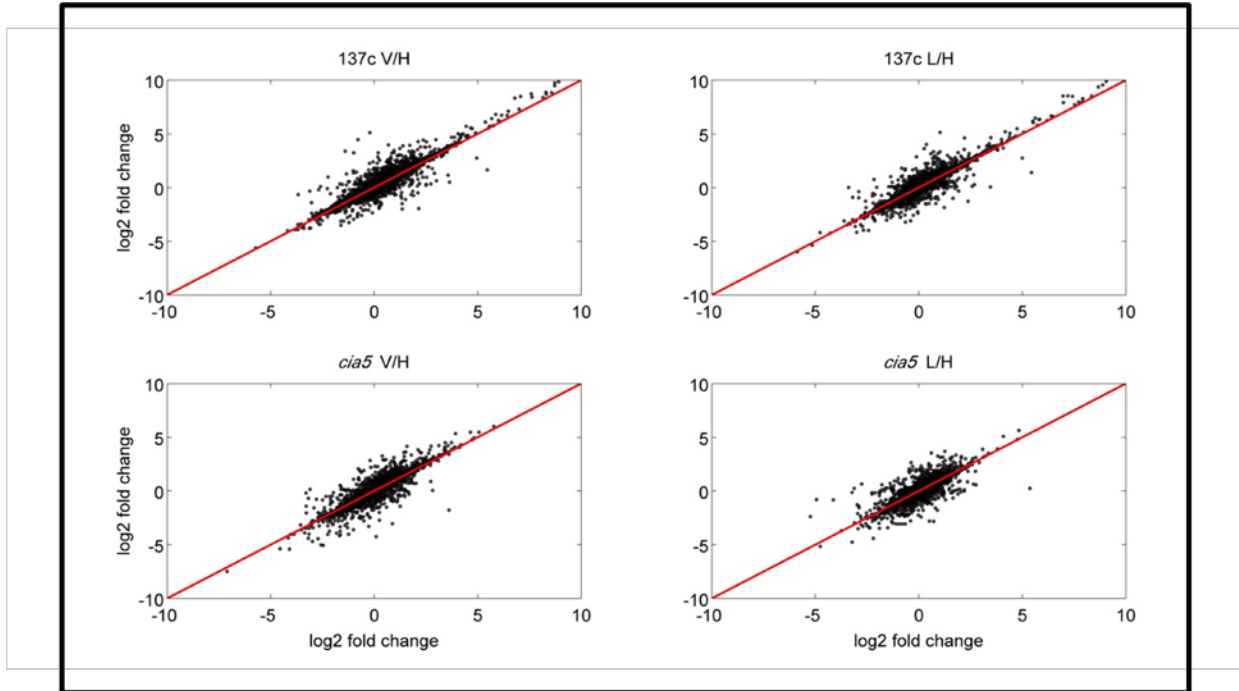

**Supplemental Figure 5. Comparison of log<sub>2</sub> fold change estimates between different analysis pipelines.**

Each panel compares log<sub>2</sub> fold change estimates as presented in the manuscript (x axis) to those obtained from an alternative, simplified pipeline on trimmed sequences (see Supplementary Data Methods). For each strain (137c, *cia5*), shown are log<sub>2</sub> fold changes of very low vs. high CO<sub>2</sub> (V/H) and low vs. high CO<sub>2</sub> (L/H).

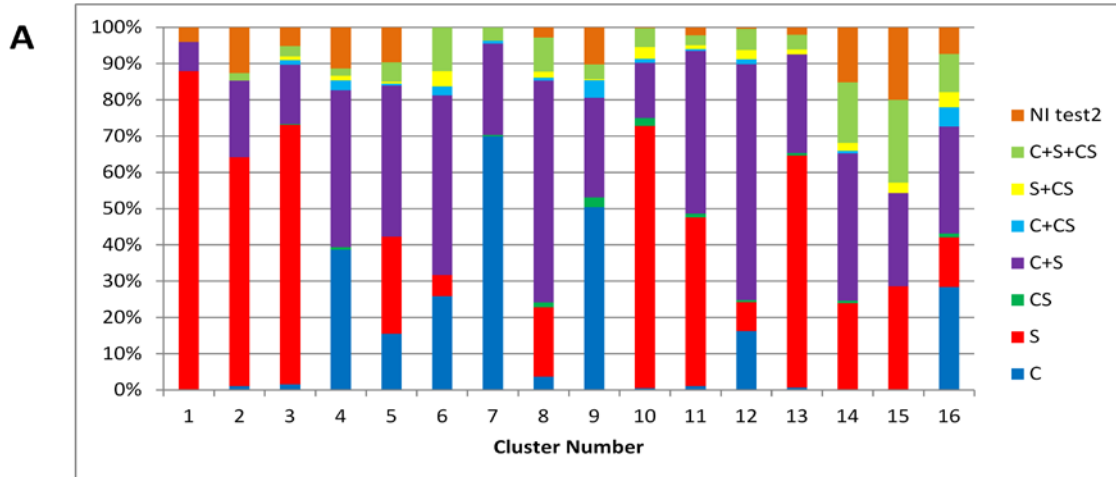

**B**

| Significant effects | Total genes | For each Cluster |           |            |            |            |            |            |            |            |            |            |            |            |            |           |           |
|---------------------|-------------|------------------|-----------|------------|------------|------------|------------|------------|------------|------------|------------|------------|------------|------------|------------|-----------|-----------|
|                     |             | 1                | 2         | 3          | 4          | 5          | 6          | 7          | 8          | 9          | 10         | 11         | 12         | 13         | 14         | 15        | 16        |
| C                   | 633         | 0                | 1         | 6          | 58         | 29         | 62         | 170        | 13         | 187        | 2          | 2          | 75         | 1          | 0          | 0         | 27        |
| S                   | 1184        | 109              | 60        | 277        | 0          | 50         | 14         | 0          | 69         | 0          | 333        | 85         | 37         | 94         | 33         | 10        | 13        |
| CS                  | 36          | 0                | 0         | 1          | 1          | 0          | 0          | 1          | 5          | 10         | 10         | 2          | 3          | 1          | 1          | 0         | 1         |
| C+S                 | 1324        | 10               | 20        | 63         | 65         | 78         | 119        | 61         | 220        | 102        | 70         | 82         | 301        | 40         | 56         | 9         | 28        |
| C+CS                | 57          | 0                | 0         | 5          | 4          | 1          | 6          | 2          | 3          | 18         | 5          | 1          | 6          | 0          | 1          | 0         | 5         |
| S+CS                | 63          | 0                | 0         | 4          | 2          | 1          | 10         | 0          | 6          | 1          | 15         | 2          | 12         | 2          | 3          | 1         | 4         |
| C+S+CS              | 216         | 0                | 2         | 11         | 3          | 10         | 29         | 9          | 34         | 15         | 24         | 5          | 27         | 6          | 23         | 8         | 10        |
| NI test2            | 165         | 5                | 12        | 20         | 17         | 18         | 0          | 0          | 10         | 38         | 1          | 4          | 2          | 3          | 21         | 7         | 7         |
| <b>total C</b>      | <b>2230</b> | <b>10</b>        | <b>23</b> | <b>85</b>  | <b>130</b> | <b>118</b> | <b>216</b> | <b>242</b> | <b>270</b> | <b>322</b> | <b>101</b> | <b>90</b>  | <b>409</b> | <b>47</b>  | <b>80</b>  | <b>17</b> | <b>70</b> |
| <b>total S</b>      | <b>2787</b> | <b>119</b>       | <b>82</b> | <b>355</b> | <b>70</b>  | <b>139</b> | <b>172</b> | <b>70</b>  | <b>329</b> | <b>118</b> | <b>442</b> | <b>174</b> | <b>377</b> | <b>142</b> | <b>115</b> | <b>28</b> | <b>55</b> |
| <b>total CS</b>     | <b>372</b>  | <b>0</b>         | <b>2</b>  | <b>21</b>  | <b>10</b>  | <b>12</b>  | <b>45</b>  | <b>12</b>  | <b>48</b>  | <b>44</b>  | <b>54</b>  | <b>10</b>  | <b>48</b>  | <b>9</b>   | <b>28</b>  | <b>9</b>  | <b>20</b> |
| <b>total</b>        | <b>3678</b> | <b>124</b>       | <b>95</b> | <b>387</b> | <b>150</b> | <b>187</b> | <b>240</b> | <b>243</b> | <b>360</b> | <b>371</b> | <b>460</b> | <b>183</b> | <b>463</b> | <b>147</b> | <b>138</b> | <b>35</b> | <b>95</b> |

**Supplemental Figure 6. Distribution of C/S impact test results by cluster.**

**(A)** C/S impact test results for genes identified by the overall test as DE genes and clustered in 16 clusters. Cluster number is indicated on the horizontal axis, and the vertical axis indicates the percentage sum for significant individual effects, where significant = means  $q$ -value  $< 0.025$ . Different colors indicate specific individual effects or combinations as: C = significant CO<sub>2</sub> effect only; S = significant strain effect only; CS = significant strain and CO<sub>2</sub> interaction effect only; C+S = significant CO<sub>2</sub> and strain effect only; C+CS, significant CO<sub>2</sub> and interaction effect only; S+CS = significant strain and interaction effect only; C+S+CS = all 3 effects are significant; NI test2 = no significant effects in the C/S impact test but identified as a DE gene in the general test.

**(B)** Summary of the quantitative details for genes in the C/S impact test. The first column lists all combinations of significant individual effects; Total C, Total S or Total CS = all genes with indicated effect, including genes having either or both of the other individual effects. Totals are shown for all genes, as well as totals for each cluster.

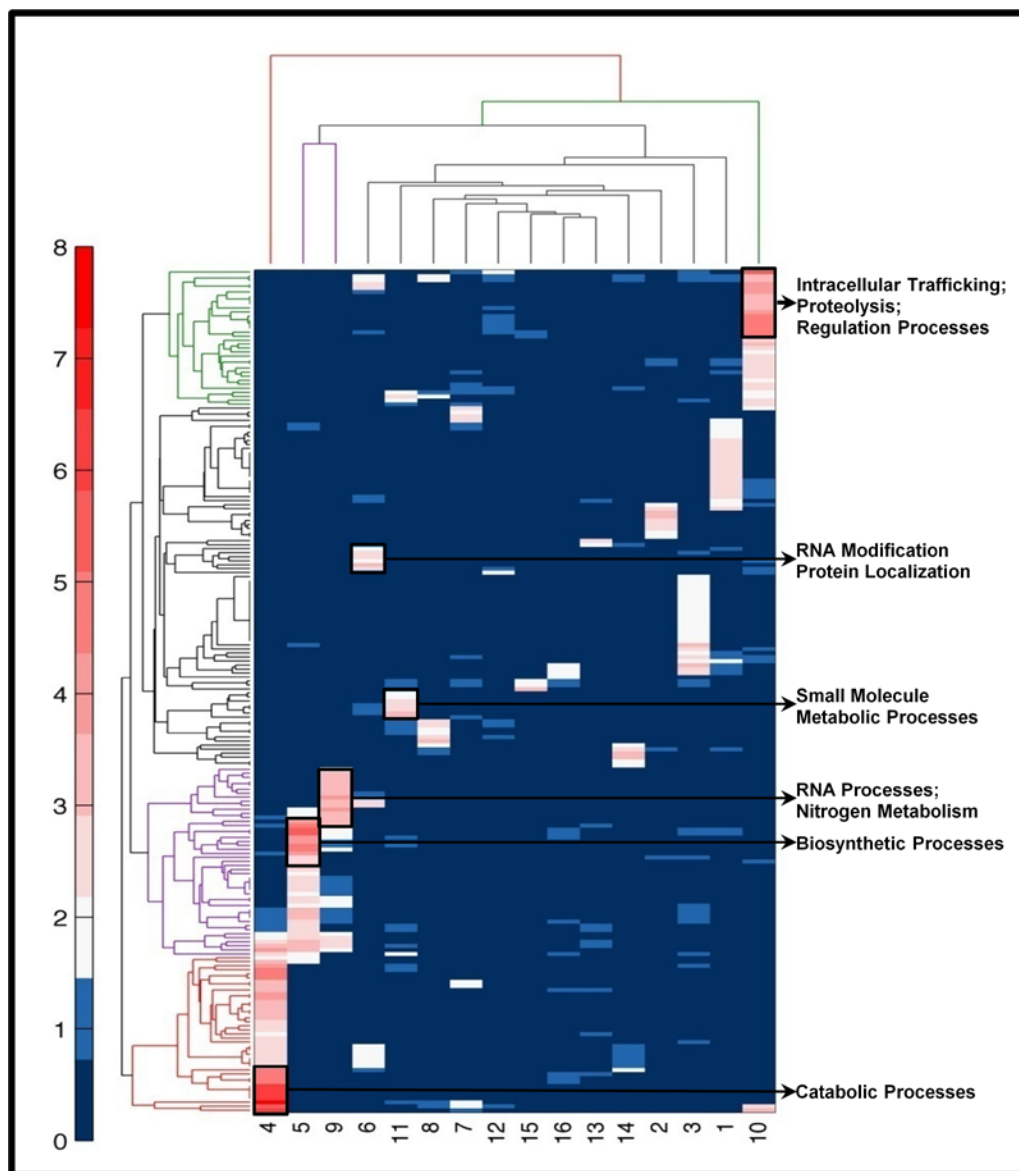

**Supplemental Figure 7. Heat map for GO category hits based on the Algal Functional Annotation Tool.**

The heat map summarizes the Gene Ontology (GO) analysis results in the category of Biological Processes. GO terms and gene clusters were subjected to hierarchical clustering so that gene clusters with common significant ( $p < 0.01$ ) ontology terms are placed close to each other in the tree for clearer illustration. Color schemes are indicated by the left vertical bar, where the numbers show the scale of negative logarithm of  $p$ -values. As a guide, darker in red means higher statistical significance for GO terms enriched in each cluster. Missing GO terms in any given cluster were assigned a  $p$ -value of 1. The almost complete absence of common GO hits between different clusters verifies the functional specificity of our gene clusters. Some highly enriched functional categories for specific clusters are highlighted as examples. Full details and enrichment  $p$ -values are provided in Supplemental Data Set 3 and discussed in the text.

**Supplemental Table 1. Alignment Statistics for the transcriptome sequencing experiment.**

| <b>Condition and replicate</b> | <b>Total Reads</b> | <b>Read Length</b> | <b>Uniquely Aligned (%)</b> | <b>Uniquely Aligned to AU5 Models</b> | <b>Uniquely Aligned to AU5 Models (%)</b> |
|--------------------------------|--------------------|--------------------|-----------------------------|---------------------------------------|-------------------------------------------|
| H-137c #1                      | 14619355           | 75                 | 92.5                        | 10896815                              | 74.54%                                    |
| H-137c #2                      | 13479946           | 80                 | 93.0                        | 10661929                              | 79.09%                                    |
| L-137c #1                      | 13777581           | 75                 | 92.6                        | 10159785                              | 73.74%                                    |
| L-137c #2                      | 12671440           | 80                 | 92.9                        | 10023000                              | 79.10%                                    |
| VL-137c #1                     | 12228767           | 75                 | 90.3                        | 9749032                               | 79.72%                                    |
| VL-137c #2                     | 12040923           | 80                 | 93.1                        | 7982253                               | 66.29%                                    |
| H- <i>cia5</i> #1              | 14659855           | 75                 | 91.0                        | 11199868                              | 76.40%                                    |
| H- <i>cia5</i> #2              | 15759589           | 83                 | 93.0                        | 12191567                              | 77.36%                                    |
| L- <i>cia5</i> #1              | 13574874           | 75                 | 92.0                        | 9464649                               | 69.72%                                    |
| L- <i>cia5</i> #2              | 18051524           | 83                 | 92.6                        | 15124925                              | 83.79%                                    |
| VL- <i>cia5</i> #1             | 15234796           | 75                 | 91.7                        | 11410522                              | 74.90%                                    |
| VL- <i>cia5</i> #2             | 19956363           | 83                 | 93.0                        | 15364398                              | 76.99%                                    |

“Condition and replicate” column lists all RNA samples sequenced in this article: “H”, “L”, and “VL” are the CO<sub>2</sub> conditions; “137c” and “cia5” are the two strains we used in this experiment; “#1” or “#2” indicate the first or second biological replicate. “AU5 model” is the Augustus 5.0 gene model.



**Supplemental Table 2. List of qPCR primers.**

| Augustus 5.0 Protein ID | Gene Name        | Primer pair sequences                                         |
|-------------------------|------------------|---------------------------------------------------------------|
| 522126                  | <i>CAH1</i>      | 5' TCCTGGACGGGAAGGGTT 3'<br>5' CGATGCGGTTGGTCTGGTT 3'         |
| 526413                  | <i>CAH3</i>      | 5' AACCTGGCGTTCATTGGC 3'<br>5' CCTTGGGCGAGGGCTT 3'            |
| 512520                  | <i>CAH6</i>      | 5' TCTGGAGTATGCCGTGCTT 3'<br>5' TTGGCGCTCATGCTGTT 3'          |
| 518901                  | <i>CIA5/CCM1</i> | 5' GGTCACGATGCGTCATTAGCG 3'<br>5' CAAGTGGTCCCTGTGATGCTCC 3'   |
| 518934                  | <i>HLA3</i>      | 5' CTCCGAGCGTCGTCTTTGTT 3'<br>5' TCGGCGTTCAGCTCCTCA 3'        |
| 510298                  | <i>LCIB</i>      | 5' TCACTGGTGACAACACCATCGC 3'<br>5' TGTTGAACGAGGAGCCGAAGATG 3' |
| 522129                  | <i>LCIE</i>      | 5' AGCTACGTGGTGGTGAACGG 3'<br>5' TCATCATGTACTTGCGAGGGAT 3'    |
| 523557                  | <i>RHP1</i>      | 5' TTCGGAGCCTACTACGGATTG 3'<br>5' GCCTTCTTGGCATCGGTC 3'       |
| 514942                  | <i>CBLP</i>      | 5' ATGTGCTGTCCGTGGCTTTC 3'<br>5' CAGACCTTGACCATCTTGTCCC 3'    |
